# Supplementary material
Source: Springer Nature journal article supplement (https://www.springermedizin.de/resource/supplementary/12985_2010_1047_MOESM2_ESM.pdf/9609024)

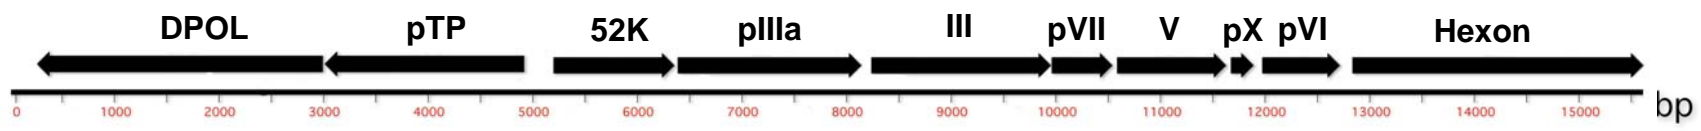

Deg. PCR DPOL

Deg. PCR pTP

Deg. PCR Hex 5'

Deg. PCR Hex 3'

Specific LD-PCR 2.9 kb

Specific LD-PCR 2.1 kb

Specific LD-PCR 10 kb

Contiguous sequence 15.6 kb

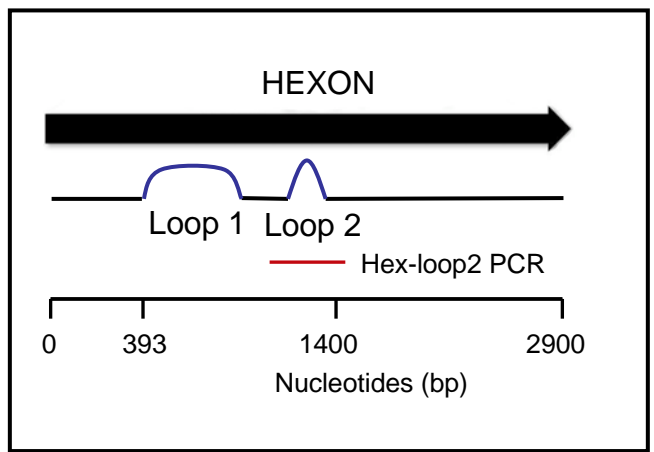

Supplement: MOESM2 [file 9609024]
